# Supplementary material
Source: PubMed Central journal article supplement (PMC31170)

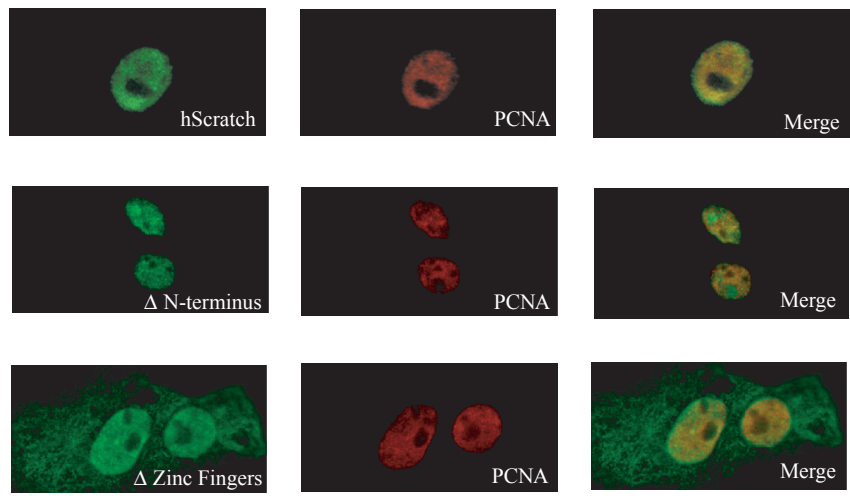

Supplement: pnas_051014098_2.pdf [file pnas_051014098_2.pdf]
